# Supplementary material for: Predictors of outcome in large vessel occlusion stroke patients with intravenous tirofiban treatment: a post hoc analysis of the RESCUE BT clinical trial
Source: PubMed Central journal article supplement (PMC11218210; doi:10.1186/s12883-024-03733-w), 2024-07-01

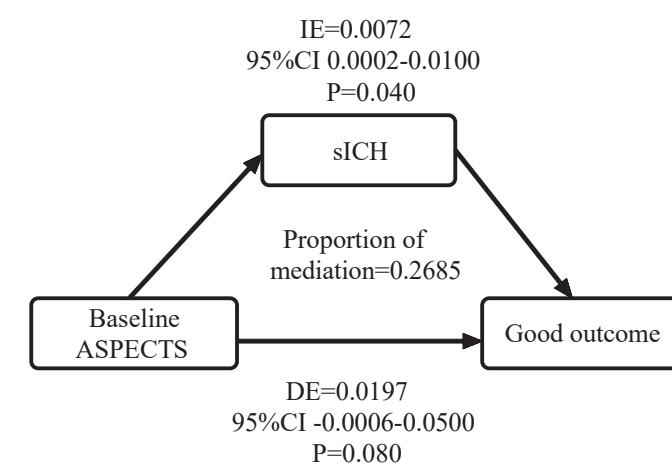

Supplement: 12883_2024_3733_MOESM1_ESM.pdf [file 12883_2024_3733_MOESM1_ESM.pdf]
